# Supplementary material
Source: PubMed Central journal article supplement (PMC1779894)
Supplement: bmj_334_7585_103__1.pdf [file bmj_334_7585_103__1.pdf]

- w1. Health Protection Agency. A complex picture: HIV and other sexually transmitted infections in the United Kingdom: 2006.  
[www.hpa.org.uk/publications/2006/hiv\\_sti\\_2006/contents.htm](http://www.hpa.org.uk/publications/2006/hiv_sti_2006/contents.htm).
- w2. Imrie J, Stephenson JM, Cowan FM, Wanigaratne S, Billington AJ, Copas AJ, et al. A cognitive behavioural intervention to reduce sexually transmitted infections among gay men: randomised trial. *BMJ* 2001;322:1451-6.
- w3. Kirby D. No easy answers: research findings on programs to reduce teen pregnancy. Washington DC: National Campaign to Prevent Teen Pregnancy, 1997.
- w4. Macgregor AC. Do condoms in public schools affect the pregnancy rate? *Can J Public Health* 2000;91:33.
- w5. Flewelling RL, Bauman KE. Family structure as a predictor of initial substance use and sexual intercourse in early adolescence. *J Marriage Fam* 1990;52:171-81.
- w6. Ellis BJ, Bates JE, Dodge KA, Fergusson DM, Horwood LJ, Pettit GS, et al. Does father absence place daughters at special risk for early sexual activity and teenage pregnancy. *Child Dev* 2003;74:801-21.
- w7. Cohen M. Adolescent sexual activity as an expression of nonsexual needs. *Pediatr Annals* 1995;24:324-9.
- w8. Stoneburner RL, Low-Beer D. Population-level HIV declines and behavioural risk avoidance in Uganda. *Science* 2004;304:714-8.
- w9. Low-Beer D, Stoneburner R. Behaviour and communication changes in reducing HIV: is Uganda unique? *African J AIDS Res* 2003;2:9-21.
- w10. Blake S, Frances G. Just say no to abstinence education. National Children's Bureau, 2001.
- w11. Mohn JK, Tingle LR, Finger R. An analysis of the causes of the decline in non-marital birth and pregnancy rates for teens from 1991-1995. *Adolesc Fam Health* 2003;3:39-47.
- w12. Jemmott JB. Abstinence instruction delays sex among teens. Presentation at the 16th International AIDS Conference, Toronto, August 2006.  
[www.annenbergpublicpolicycenter.org/Releases/Release\\_HC20060815/Release\\_HC20060815.pdf](http://www.annenbergpublicpolicycenter.org/Releases/Release_HC20060815/Release_HC20060815.pdf).
- w13. BBC news. School leaving age set to be 18.  
<http://news.bbc.co.uk/1/hi/education/6254833.stm>.
